# Supplementary material
Source: PubMed Central journal article supplement (PMC4356838)
Supplement: AAC.00015-15_zac004153879so1.pdf [file AAC.00015-15_zac004153879so1.pdf]

## 1 **Supplemental Material**

2

### 3 **Figure legends**

4

5 **Supplemental Figure 1. Synthesis of 5-hydroxy-PQ and subsequent air oxidation to the 5,6-**  
6 **ortho-quinone. A.** 5-OH-PQ was synthesized via palladium catalyzed hydrogenation of the 5-o-  
7 benzyl-PQ starting material in ethyl acetate for 120 minutes at 25 °C. The reaction mixture was  
8 characterized using NMR (300 MHz, CDCl<sub>3</sub>) 8.76 (dd, *J*=4.8, 1.5Hz, 1H), 8.41 (dd, *J*=4.8,  
9 1.8Hz, 1H), 7.59 (dd, *J*=4.8, 1.8Hz, 1H), 7.53 (br s, 1H), 5.95 (s, 1H), 4.58 (br s, 1H), 3.75-3.81  
10 (m, 1H), 3.17 (dd, *J*=12.9, 6.6Hz, 2H), 1.60-1.77 (m, 4H), 1.45 (s, 9H), 1.38 (d, *J*=6.6Hz, 3H)  
11 and LC-MS analyses. Masses corresponding for the starting material (**B**), 6-methoxy-quinone  
12 imine (product 2, **C**), and 5,6-ortho-quinone (product 3, **D**) were observed. Intact mass spectra  
13 are indicated in i, and MS/MS fragmentation data in ii. The corresponding mass fragments in ii  
14 are labelled and mass differences are indicated from the parent ions. Purification of the shown  
15 reaction mixture using chromatography on silica gel yielded the 5,6-orthoquinone (product 3).

16

### 17 **Supplemental Figure 2. Reference compounds utilized in Primaquine pharmacokinetic**

18 **study. (A)** The structures of Primaquine (PQ), carboxy-Primaquine (CPQ), 2, 3, and 4  
19 hydroxylated Primaquine (OH-PQ) are shown. The marker for 5-hydroxylation (5,6-ortho-  
20 quinone) is also shown. The quinolone rings of Primaquine and the hydroxylated metabolites are  
21 numbered for reference. (**B**) Liquid chromatography and mass spectrometry parameters utilized  
22 for quantitation of PQ and the various metabolites. Shown for each molecule are the observed  
23 *m/z* ions, product *ms/ms* ions, cone voltages, collision energies, and electrospray polarities

24 utilized for quantitation. Additionally, the retention times for each molecule are also indicated.

25 Separate standard curves and analyses of PK samples were conducted for each analyte.

26

Starting Material

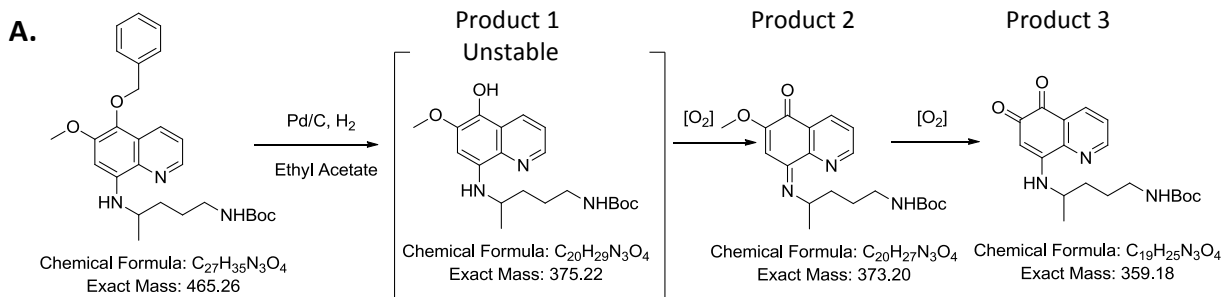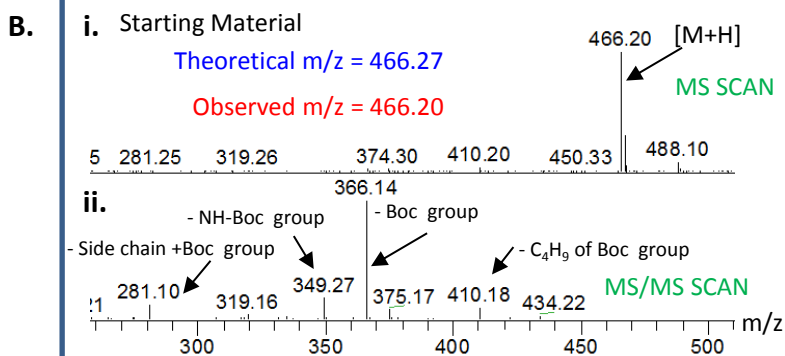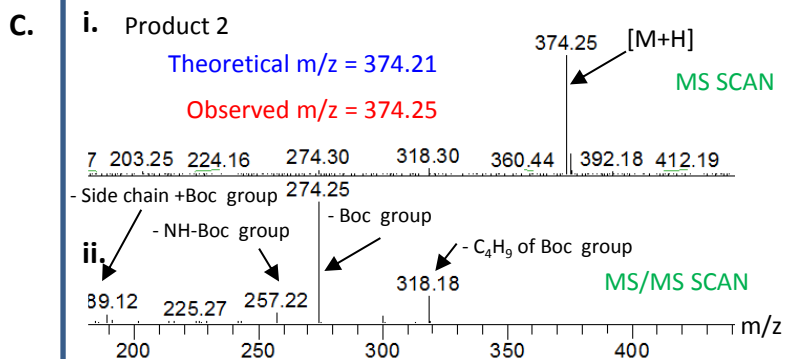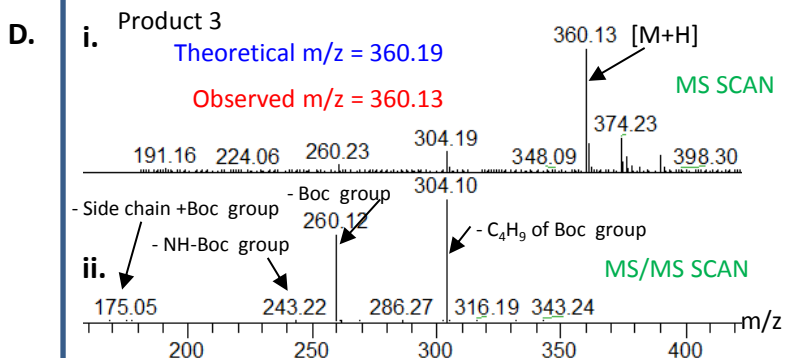

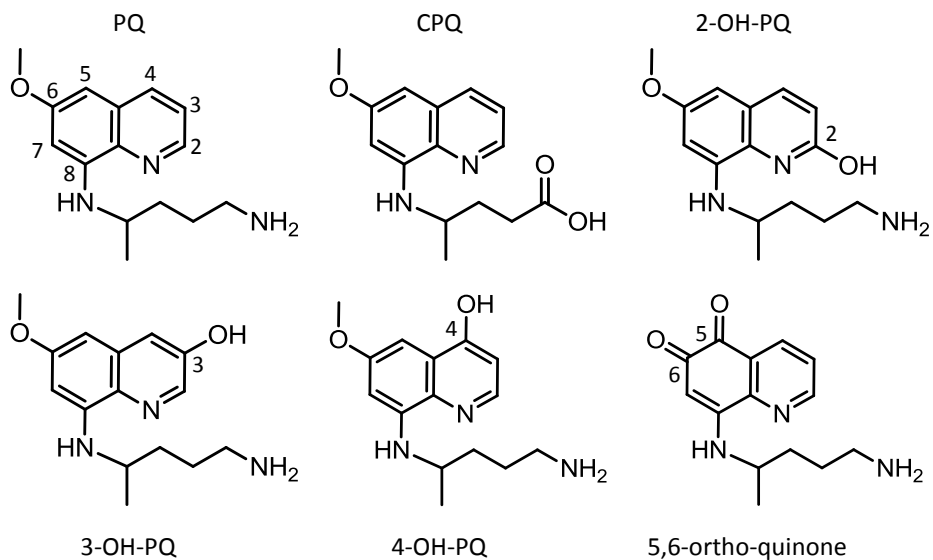

|                  | Observed Parent m/z | Product m/z | Cone (v) | Collision (v) | ESI Mode | Retention Time | Plasma LLOQ (ng/mL) | Liver LLOQ (ng/mL) |
|------------------|---------------------|-------------|----------|---------------|----------|----------------|---------------------|--------------------|
| PQ               | 260.26              | 175.02      | 22       | 22            | Pos      | 2.10           | 2.5                 | 2.5                |
| CPQ              | 275.16              | 175.02      | 18       | 24            | Pos      | 2.57           | 2.5                 | 2.5                |
| 2-OH-PQ          | 276.13              | 69.08       | 8        | 24            | Pos      | 2.00           | 10                  | 50                 |
| 3-OH-PQ          | 276.19              | 86.09       | 24       | 16            | Pos      | 2.04           | 2.5                 | 25                 |
| 4-OH-PQ          | 276.19              | 191.17      | 38       | 16            | Pos      | 1.87           | 25                  | 25                 |
| 5,6-o-quinone-PQ | 260.20              | 147.08      | 26       | 30            | Pos      | 1.80           | 50                  | 50                 |
